1 **The Burden of Generational Harm due to Alcohol use in Tanzania: a mixed method study**  
2 **of pregnant women**

3 **Short title:** Alcohol Use and Pregnancy in Moshi, Tanzania

4 **Authors and affiliations:**

5 Kirstin West, MSGH<sup>1</sup> - [kirstin.west@duke.edu](mailto:kirstin.west@duke.edu)

6 Alena Pauley, MSGH<sup>1</sup> - [alena.pauley@duke.edu](mailto:alena.pauley@duke.edu)

7 Mia Buono, MSGH<sup>1</sup> - [mia.buono@duke.edu](mailto:mia.buono@duke.edu)

8 Miriana Mikindo<sup>2</sup> - [mirianamikindo@gmail.com](mailto:mirianamikindo@gmail.com)

9 Yvonne Sawe<sup>2</sup> - [yvonesawe90@gmail.com](mailto:yvonesawe90@gmail.com)

10 Joseph Kilasara, APRN MNS-FNP<sup>2,3</sup> - [joseph.kilasara@kcmuco.ac.tz](mailto:joseph.kilasara@kcmuco.ac.tz)

11 Francis Sakita<sup>4,5</sup> - [francis.sakita@gmail.com](mailto:francis.sakita@gmail.com)

12 Sharla Rent, MD MSGH<sup>1,6</sup> - [sharla.rent@duke.edu](mailto:sharla.rent@duke.edu)

13 Bariki Mchome, MD PhD<sup>5,7</sup> - [barikimchome@gmail.com](mailto:barikimchome@gmail.com)

14 \*Catherine A. Staton, MD MSGH<sup>1,8</sup> - [catherine.staton@duke.edu](mailto:catherine.staton@duke.edu)

15 \*Blandina T. Mmbaga, MD PhD<sup>1,2,4</sup> - [blaymt@gmail.com](mailto:blaymt@gmail.com)

16

17 1 Duke Global Health Institute, Duke University, Durham, NC USA

18 2 Kilimanjaro Clinical Research Institute, Moshi, Tanzania

19 3 Department of Clinical Nursing, Kilimanjaro Christian Medical University College, Moshi,

20 Tanzania

21 4 Kilimanjaro Christian Medical Center, Moshi, Tanzania

22 5 Kilimanjaro Christian Medical University College, Moshi, Tanzania

23 6 Duke Department of Pediatrics, Duke University School of Medicine, Durham, NC USA

24 7 Department of Obstetrics and Gynecology, Kilimanjaro Christian Medical Center, Moshi,

25 Tanzania

26 8 Department of Emergency Medicine, Duke University School of Medicine, Durham, NC USA

27 Corresponding Author in event of publication: [catherine.staton@duke.edu](mailto:catherine.staton@duke.edu) (CAS)

28 ORCID#: 0000-0002-6468-2894

29

30 *Funding:* This project was funded by the Duke Global Health Institute Graduate Student funds  
31 (AMP), and the Josiah Trent Foundation (21-06 to CAS). These two financial awards funded the  
32 salaries of JK, YS, and MMi as research assistants hired specifically for this study. No other  
33 authors received specific funding for this work. Infrastructure built by NIH grants (R01  
34 AA027512 to CAS) was used to support the data collection and analysis processed for this grant  
35 to understand gender-related aspects of alcohol use at KCMC. The funders had no role in study  
36 design, data collection and analysis, decision to publish, or preparation of the manuscript.

37 *Competing interests:* The authors declare no competing interests

38 **Author Contributions:**

39 Conceptualization: AP, KW, CAS, SR

40 Methodology: AP, KW, SR, CAS

41 Formal analysis and investigation: KW, CAS, BTM, BM, SR, FS

42 Data Collection: MM, YS, JK, AP

43 Writing - original draft preparation: KW, AP, MB, SR

44 Writing - review and edition: KW, AP, FS, SR, BM, BTM, CAS

45 Funding acquisition: AP, CAS

46 Supervision: CAS, SR, BTM

47

## 48 ABSTRACT

49 **Background:** Rates of prenatal alcohol use in Sub-Saharan Africa (SSA) are increasing, despite  
50 regulatory bodies urging pregnant women to abstain from alcohol. Tanzania has minimal policies,  
51 interventions, and young female education addressing alcohol consumption during pregnancy (ACDP),  
52 leading to a considerable number of pregnancies being exposed to alcohol and consequent health  
53 consequences like fetal alcohol spectrum disorder (FASD). Research investigating the prevalence of  
54 ACDP in SSA—specifically in Tanzania—is abundant. In Tanzania, there is a limited understanding of  
55 alcohol use practices among pregnant women who consume alcohol (PWCA), as well as community  
56 knowledge, attitudes, and cultural beliefs related to ACDP. **Methods:** A total of 655 individuals were  
57 enrolled in this sequential, explanatory mixed-methods study using systematic random sampling between  
58 October 2021 and May 2022. Quantitative survey data from 533 female patients presenting for care at  
59 KCMC ED or RHC were analyzed to compare sociodemographic factors and alcohol use practices among  
60 pregnant, younger non-pregnant, and older non-pregnant women using descriptive frequencies in  
61 RStudio. Nineteen participants were purposively selected based on quantitative survey data for qualitative  
62 semi-structured IDIs exploring knowledge, attitudes, and cultural beliefs surrounding ACDP. A grounded  
63 theory approach was used to analyze in-depth interviews (IDIs) in NVivo. **Results:** A large percent of  
64 pregnant women reported alcohol consumption of at least once per week (42.2%). Older non-pregnant  
65 women had the highest rates of alcohol use per week (66.0%) and were more likely to believe alcohol use  
66 was acceptable during pregnancy. Younger non-pregnant women reported the highest weekly alcohol  
67 expenses and held the highest prevalence of harmful or hazardous drinking (HHD) (16.4%). Average  
68 [SD] AUDIT scores were 1.70 [3.28] for pregnant women, 2.94 [4.79] for younger non-pregnant women,  
69 and 2.51 [4.36] for older non-pregnant women. Older non-pregnant women exhibited the highest  
70 prevalence of depression (31.4%). Average [SD] PHQ-9 scores were 4.71 [3.12] for pregnant women,  
71 5.85 [4.80] for younger non-pregnant women, and 7.29 [5.55] for older non-pregnant women. Qualitative  
72 analyses demonstrated that (1) cultural beliefs are intricately tied to perceived benefits of ACDP, (2) a  
73 history of alcohol use preceding pregnancy largely influences ACDP, and (3) community views of PWCA  
74 are negative. **Significance:** Our findings demonstrate a concerning trend of ACDP in Moshi, Tanzania.

75 Cultural and community beliefs, along with limited knowledge of ACDP, among women of all ages  
76 appear to influence ACDP and community views of PWCA. Consequently, community-wide education  
77 initiatives and pre-pregnancy interventions highlighting the dangers of ACDP are necessary. Holistic  
78 support services may help curb alcohol use and improve birth experiences. Further research is needed to  
79 explore ACDP as a form of self-medication for depression, fear, anxiety, and pain in pregnant women in  
80 SSA.

81 **Keywords:** pregnancy, alcohol use, Tanzania, mixed-methods

82 **Abbreviations:**

83 *PWCA: Pregnant women who consume alcohol*

84 *ACDP: Alcohol consumption during pregnancy*

85 *SSA: Sub-Saharan Africa*

## 86 1 INTRODUCTION

87 As alcohol use increases globally, so do the number of alcohol-related health consequences,  
88 including death and disability<sup>1,2</sup>. In a 2020 global risk assessment, alcohol consumption ranked among  
89 the top ten factors impacting overall health, and served as a major risk factor for communicable, maternal,  
90 perinatal, and nutritional diseases<sup>2</sup>.

91 A notable, well-established alcohol-related harm is the detrimental effect on pregnancy<sup>2-4</sup>.  
92 Alcohol use during this time period can cause an increased risk of birth defects, developmental  
93 disabilities, miscarriage, intrauterine growth restriction, spontaneous abortion, preterm labor, and  
94 stillbirth<sup>3,4</sup>. Global estimates from 1984 to 2014 indicated that approximately 9.8% of pregnant women  
95 worldwide consumed alcohol<sup>5</sup>. Particularly prevalent in low- and middle-income countries, rates of  
96 alcohol consumption during pregnancy (ACDP) can range from 2.5% in Nigeria to as high as 32.5% in  
97 the Democratic Republic of the Congo (Popova et al., 2016). Fetal alcohol spectrum disorder (FASD)—a  
98 congenital syndrome caused by intrauterine fetal alcohol exposure and characterized by growth retardation,  
99 facial dysmorphism, cognitive dysfunction, and neurobehavioral disabilities in the fetus—has an  
100 estimated prevalence of 14.8% in Africa, further highlighting alarming rates of ACDP in the region<sup>5,7,8</sup>.  
101 The WHO African region was found to have the highest prevalence of binge drinking, defined as having  
102 four or more drinks on a single occasion, during pregnancy, estimated at 3.1%<sup>9</sup>. This is increasingly  
103 concerning as populations with high rates of binge drinking have been linked to similarly high rates of  
104 FASD<sup>10-12</sup>.

105 Existing literature emphasizes the profound health consequences of ACDP in sub-Saharan Africa  
106 (SSA), necessitating increased awareness and robust intervention strategies. The World Health  
107 Organization (WHO) urges pregnant women to abstain from alcohol use due to the health risks for the  
108 mother and fetus<sup>13</sup>. However, countries such as Tanzania have minimal policy and health system work  
109 addressing ACDP. Further, the findings regarding the association between alcohol use and perinatal harm  
110 are not always communicated to pregnant women. The lack of intervention and young female education  
111 contributes to a considerable number of pregnancies in Tanzania being subject to alcohol exposure, with  
112 nearly 20% in Northern Tanzania and 15% in Dodoma, the capital of Tanzania<sup>14</sup>. In Moshi, Tanzania,

113 rates of alcohol use are 2.5 times higher than the national average, which raises concerns that similar  
114 patterns of alcohol consumption likely extend to pregnant women, warranting further investigation<sup>15</sup>.

115 Cultural practices and beliefs are intricately linked to ACDP in SSA, impacting pregnant  
116 women's decision to alcohol consumption. Cultural traditions and values are passed down through  
117 generations and constitute knowledge that effectively shapes pregnant individuals' alcohol use practices,  
118 complicating some education efforts. Comprehending the extent and depth of cultural influences on  
119 ACDP is critical to developing culturally appropriate interventions aimed at preventing alcohol use  
120 among pregnant women.

121 Research investigating the prevalence of ACDP in SSA is abundant<sup>6,9,14,16</sup>. However, there is a  
122 limited understanding of alcohol use practices, the knowledge and attitudes related to ACDP, and the  
123 ways these impact cultural beliefs among both pregnant women and women of child-bearing age. This  
124 information is needed to inform future intervention design and policy efforts, as well as bolstering  
125 education efforts for women of childbearing age, with the ultimate goal of better supporting pregnant  
126 women and reducing alcohol-related pregnancy complications. This study aims to address this gap by  
127 providing a more comprehensive understanding of the sociocultural factors, such as knowledge and  
128 attitudes, influencing alcohol use practices among pregnant women presenting to either the Kilimanjaro  
129 Christian Medical Centre (KCMC) Emergency Department (ED) or Reproductive Health Center (RHC).  
130 The objectives of this study are to (1) evaluate the proportion of pregnant women who consume alcohol  
131 (PWCA), (2) investigate consumption patterns and alcohol use practices of pregnant women and non-  
132 pregnant women, accounting for child-bearing age (3) assess community knowledge, attitudes, and  
133 cultural beliefs on ACDP.

## 134 **2 METHODS**

### 135 **Study Design Overview**

136 This analysis originates from a sequential, explanatory mixed-methods study conducted in Moshi,  
137 Tanzania—an urban town with over 200,000 residents—focused on exploring unhealthy alcohol  
138 consumption at the KCMC ED and RHC. The high concentration of injury patients at KCMC’s ED and  
139 the large female patient population at the RHC provide ideal settings to study risky alcohol use behaviors,  
140 particularly among pregnant women. Participants were prospectively recruited for this study starting in  
141 October 2021 and ending in May 2022. Quantitative surveys and qualitative semi-structured in-depth  
142 interviews (IDIs) were conducted, with surveys used to guide purposeful qualitative data sampling. A  
143 total of 541 women were enrolled in this study, with 533 providing complete survey data. In addition to  
144 women, men were included in in-depth interviews (IDIs) to provide a broader community perspective on  
145 ACDP, totaling 10 female and 9 male IDI participants. A thorough overview of the methods has been  
146 previously published <sup>17</sup>.

### 147 **Exclusion Criteria**

148 Those eligible for study participation had sought medical care at the KCMC ED or the KCMC  
149 RHC<sup>18</sup>, were over the age of 18, not prisoners, fluent in Kiswahili, and able to provide informed consent.  
150 Ability to provide consent was defined as being clinically sober, medically stabilized, and physically able  
151 to complete the survey verbally. Pregnant females were defined as women who had a confirmed in-utero  
152 pregnancy, based on self-report. Literature defines the reproductive lifespan of women as 45 years and  
153 below<sup>45</sup>. This criterion was used as the cut-off value to distinguish between childbearing age ( $\leq 45$  years;  
154 e.g., younger) and non-childbearing age (46+ years; e.g., older) among non-pregnant women.

### 155 **Quantitative Data**

#### 156 *Procedures*

157 Using intake triage registries from the ED and the RHC, a systematic random sampling approach  
158 was used to approach every third patient seeking care. Gender-matched Tanzanian research assistants  
159 proficient in Kiswahili provided a comprehensive overview of the study to participants in a quiet and  
160 private clinic space, only after the patient had achieved medically stability and clinical sobriety. Patients

161 were given the opportunity to inquire about the study, decline participation, or express interest. For those  
162 willing to participate, a detailed discussion regarding the study, including potential risks and benefits,  
163 took place. Written informed consent was then obtained. Patients who were illiterate marked their initials  
164 or a cross mark. Survey questions were read aloud to encourage participation across different literacy  
165 levels.

## 166 ***Instruments***

167 Quantitative surveys were the primary instruments, assessing baseline sociodemographic factors,  
168 self-reported alcohol use, Alcohol Use Disorder Identification Test (AUDIT) scores, Drinker's Inventory  
169 of Consequences (DrInC) scores, and Patient Health Questionnaire (PHQ-9) depression scores. The  
170 Tanzanian research team translated, reviewed, revised, and pilot-tested all survey questions on  
171 sociodemographic data and self-reported alcohol use prior to data collection. Participants were asked to  
172 report their alcohol consumption quantity in terms of standard drinks, per WHO guidelines where one  
173 standard drink contains 10 grams of pure ethanol <sup>19</sup>.

174 To comprehensively assess alcohol consumption and unhealthy alcohol-related behaviors among  
175 pregnant women, the AUDIT survey tool—with scores ranging from 0 to 40—was employed <sup>20,21</sup>. An  
176 AUDIT score of 8 or above indicates clinically significant harmful or hazardous drinking (HHD), in both  
177 global and study settings <sup>20,22–25</sup>. Patients with HHD (AUDIT  $\geq$  8) were identified, as their alcohol  
178 consumption places them at risk for serious health consequences, necessitating additional alcohol-related  
179 treatment and social support <sup>26</sup>.

180 The DrInC survey quantitatively evaluates alcohol-related consequences, with higher scores  
181 indicating greater consequences. It includes 50 yes-or-no questions across five domains: physical,  
182 intrapersonal, social responsibility, interpersonal, and impulse control <sup>27–29</sup>. The DrInC tool does not  
183 measure severity or frequency of alcohol-related consequences, and no clinically relevant cut-off score  
184 exists. This survey was cross-culturally adapted and clinically tested at KCMC before use in this study <sup>29</sup>.

185 The PHQ-9 tool is globally recognized for diagnosing depression, scaled from 0 to 27. It includes  
186 9 items assessing depressive symptoms such as appetite changes, sleep patterns, and thoughts of self-  
187 harm, with responses to each item scored from 0 to 3 <sup>30–32</sup>. Higher scores indicate more severe depression.



188 Translated into Kiswahili and validated in Tanzania, a score of 9 is the optimal cut-off for identifying  
189 major depressive episodes (MDD), classifying patients into depression (PHQ-9  $\geq$  9) and non-depression  
190 (PHQ-9 < 9) groups <sup>30,31,33–36</sup>.

## 191 *Analysis*

192 Descriptive frequencies and statistics were used to compare sociodemographic factors and  
193 alcohol use between pregnant women, non-pregnant women of childbearing age ( $\leq$ 45 years), and non-  
194 pregnant women not of childbearing age ( $>$ 45 years). Quantitative measures, including AUDIT, DrInC,  
195 and PHQ-9 scores, were also compared between pregnant and non-pregnant women. Continuous and  
196 categorical data were compared using Analysis of Variance (ANOVA) type 3 sum of squares, and  
197 Pearson's chi-square test, respectively. Data analyses were performed using user-tested packages in  
198 RStudio (version 1.4).

## 199 **Qualitative Data**

### 200 *Sampling*

201 Individuals from the quantitative survey were purposefully sampled to participate in semi-  
202 structured IDIs, ensuring a diverse range of demographic backgrounds like age, marital status, education  
203 level, occupation, tribe, and religion. Those considered for IDIs were individuals reporting neutral or  
204 positive past experiences with alcohol, former alcohol users who are currently abstinent, patients with  
205 close friends or family members who consume alcohol heavily, and those who suffered adverse  
206 consequences from their own drinking. This methodological approach aimed to capture a wide range of  
207 perspectives on ACDP. To further ensure a holistic view of community knowledge and personal  
208 perspectives on ACDP, a gender-balanced approach was used. That is, we aimed to interview ten males  
209 and ten females since data saturation is typically reached around 20 interviews <sup>37–39</sup>. However, saturation  
210 was reached with 19 IDIs, comprising nine males and ten females

### 211 *Procedures*

212 Upon completion of the quantitative survey, research assistants identified suitable candidates for  
213 IDIs using their professional judgment, with monthly reviews of sociodemographic and alcohol-use-

214 related data conducted to ensure diverse representation of participants. Consenting participants provided  
215 their phone numbers to schedule interviews.

216 Interviewers were fluent in Kiswahili, gender- matched, and had previously established rapport  
217 with the patients during the survey phase to foster open and candid discussions, especially on sensitive and  
218 stigmatized topics. Prior to starting the one-on-one interviews, the study goals were communicated, and  
219 participants received 5,000 TSH (~2 USD) to cover transportation costs. All interviews were audio-  
220 recorded, typically lasting 60 to 100 minutes, and included a break with snacks. These semi-structured  
221 IDIs were assigned unique identification numbers, ranging from IDI #1 to IDI #19, of which were  
222 known only to the research team.

### 223 ***Instrument***

224 The interview guide utilized for IDIs included open-ended questions —originally created in  
225 English, and then translated into Kiswahili— with probes built in for additional questioning when the  
226 subject matter was ambiguous, vague, interesting, or inconsistent. Cultural appropriateness and relevancy  
227 were ensured during pilot testing. The standardized interview guide and related probes (Supporting File  
228 1/Appendix) were used for all participants to assess community knowledge, views, and perspectives on  
229 ACDP.

### 230 ***Analysis***

231 Qualitative data was analyzed using an applied, thematic, grounded theory approach, where IDI  
232 responses were collected and analyzed without pre-existing theoretical frameworks<sup>40,41</sup>. Considering  
233 research on pregnant female drinking behavior is limited in Moshi, the grounded theory approach was  
234 well-suited to capture emerging themes. The Tanzanian research team was trained on qualitative analysis  
235 and interview coding using NVivo 12. An iterative development process using inductive and deductive  
236 coding schemes resulted in an initial codebook. To facilitate an ongoing synthesis of data and maintain a  
237 dynamic codebook, content memos were created with each emerging theme, and subsequent code. To  
238 enhance content validity and cultural accuracy, the final analysis was discussed between the entire  
239 research team.

### 240 ***Ethics Statement***

241 Prior to data collection, ethical approval for this study was obtained from the Duke University

242 Institutional Review Board, the Kilimanjaro Christian Medical University College Ethical Review Board,

243 and the Tanzanian National Institute of Medical Research. Written consent was formally obtained from  
244 all participants. Personal health information used during screening and enrollment was de-identified for  
245 confidentiality throughout data collection, storage, analysis, and sharing. Data was only shared in  
246 accordance with a data sharing agreement.

## 247 **3 RESULTS**

### 248 *Quantitative*

249           The study sample consisted predominantly of women who self-identified as Christian (81.2%),  
250 and were affiliated with the Chagga tribe (50.0%), with ages spanning 17 to 95 years. On average,  
251 pregnant women were 29.1 years younger than non-pregnant women, with over half of pregnant women  
252 between the ages of 25 to 34 years (Table 1). Notable differences in marital status were also observed  
253 between pregnant women and non-pregnant women. For women of childbearing age, those who were  
254 more pregnant were more likely to be living with a partner in either a registered (61.2% vs 42.2% in non-  
255 pregnant women) or unregistered marriage (29.3% vs 12.9% in non-pregnant women). In comparison,  
256 those not pregnant were more likely to be single (39.7% vs 8.6% among pregnant women) or divorced  
257 (3.4% vs 0.9% among pregnant women). Younger women (pregnant or non-pregnant) were also more  
258 likely to have attained a college-level education (51.7% and 50.8% vs 9.2%), be employed (72.4% and  
259 62.1% vs 47.6%), and have higher personal and household incomes than older, non-childbearing women.  
260 These values and others can be seen in Table 1.

**Table 1: Study Population Demographics**

| <b>Demographics Stratified by Pregnancy Status</b>  | <b>Overall<br/>(n = 533)</b> | <b>Pregnant<br/>(n = 116)</b> | <b>Not Pregnant, Child-<br/>bearing<br/>(n = 232)</b> | <b>Not Pregnant, Not<br/>Child-bearing<br/>(n = 185)</b> | <b>P Value</b>       |
|-----------------------------------------------------|------------------------------|-------------------------------|-------------------------------------------------------|----------------------------------------------------------|----------------------|
| <b>Age (in years), missing: 6 pregnant</b>          | 40.9 (16.0)                  | 30.1 (5.82)                   | 31.1 (7.78)                                           | 59.4 (9.98)                                              | <b>&lt;0.001 ***</b> |
| <b>Age Category (in years), missing: 6 pregnant</b> |                              |                               |                                                       |                                                          | <b>&lt;0.001 ***</b> |
| 18 - 24                                             | 78 (14.6%)                   | 19 (16.4%)                    | 59 (25.4%)                                            | 0 (0%)                                                   |                      |
| 25 - 34                                             | 155 (29.1%)                  | 67 (57.8%)                    | 88 (37.9%)                                            | 0 (0%)                                                   |                      |
| 35 - 44                                             | 101 (18.9%)                  | 23 (19.8%)                    | 78 (33.6%)                                            | 0 (0%)                                                   |                      |
| 45 - 54                                             | 79 (14.8%)                   | 1 (0.9%)                      | 7 (3.0%)                                              | 71 (38.4%)                                               |                      |
| Over 55                                             | 114 (21.4%)                  | 0 (0%)                        | 0 (0%)                                                | 114 (61.6%)                                              |                      |
| <b>Religion, missing: 0</b>                         |                              |                               |                                                       |                                                          | 0.6886               |
| Christian                                           | 433 (81.2%)                  | 94 (81.0%)                    | 186 (80.2%)                                           | 153 (82.7%)                                              |                      |
| Muslim                                              | 91 (17.1%)                   | 21 (18.1%)                    | 43 (18.5%)                                            | 27 (14.6%)                                               |                      |
| None                                                | 8 (1.5%)                     | 1 (0.9%)                      | 3 (1.3%)                                              | 4 (2.2%)                                                 |                      |
| Other                                               | 1 (0.2%)                     | 0 (0%)                        | 0 (0%)                                                | 1 (0.5%)                                                 |                      |
| <b>Marital Status, missing: 0</b>                   |                              |                               |                                                       |                                                          | <b>&lt;0.001 ***</b> |
| Living with a partner in a registered marriage      | 263 (49.3%)                  | 71 (61.2%)                    | 98 (42.2%)                                            | 94 (50.8%)                                               |                      |
| Living with a partner, not in a registered marriage | 66 (12.4%)                   | 34 (29.3%)                    | 30 (12.9%)                                            | 2 (1.1%)                                                 |                      |
| Never Married or Single                             | 169 (31.7%)                  | 10 (8.6%)                     | 92 (39.7%)                                            | 67 (36.2%)                                               |                      |
| Divorced or Separate                                | 23 (4.3%)                    | 1 (0.9%)                      | 8 (3.4%)                                              | 14 (7.6%)                                                |                      |
| Widowed                                             | 12 (2.3%)                    | 0 (0%)                        | 4 (1.7%)                                              | 8 (4.3%)                                                 |                      |
| <b>Highest Educational Attainment, missing: 1</b>   |                              |                               |                                                       |                                                          | <b>&lt;0.001 ***</b> |
| None                                                | 8 (1.5%)                     | 0 (0%)                        | 1 (0.4%)                                              | 7 (3.8%)                                                 |                      |
| Primary                                             | 148 (27.8%)                  | 7 (6.1%)                      | 33 (14.3%)                                            | 108 (58.4%)                                              |                      |

|                                             |             |            |             |             |                      |
|---------------------------------------------|-------------|------------|-------------|-------------|----------------------|
| Secondary                                   | 131 (24.6%) | 40 (34.5%) | 58 (25.1%)  | 33 (17.9%)  |                      |
| Vocational                                  | 33 (6.2%)   | 4 (3.4%)   | 14 (6.0%)   | 15 (8.1%)   |                      |
| College                                     | 195 (36.6%) | 60 (51.7%) | 118 (50.8%) | 17 (9.2%)   |                      |
| Graduate                                    | 17 (3.2%)   | 5 (4.3%)   | 8 (3.5%)    | 4 (2.2%)    |                      |
| <b>Employment Status, missing: 0</b>        |             |            |             |             | <b>&lt;0.001 ***</b> |
| Employed                                    | 316 (59.3%) | 84 (72.4%) | 144 (62.1%) | 88 (47.6%)  |                      |
| Unemployed                                  | 156 (29.3%) | 20 (17.2%) | 41 (17.7%)  | 95 (51.4%)  |                      |
| Student                                     | 61 (11.4%)  | 12 (10.3%) | 47 (20.3%)  | 2 (1.1%)    |                      |
| <b>Tribe, missing: 0</b>                    |             |            |             |             | <b>&lt;0.01 **</b>   |
| Chagga                                      | 267 (50.0%) | 64 (55.2%) | 97 (41.8%)  | 106 (57.3%) |                      |
| Pare                                        | 50 (9.4%)   | 9 (7.8%)   | 16 (6.9%)   | 25 (13.5%)  |                      |
| Sukuma                                      | 26 (4.9%)   | 8 (6.9%)   | 13 (5.6%)   | 5 (2.7%)    |                      |
| Massai                                      | 21 (3.9%)   | 5 (4.3%)   | 8 (3.4%)    | 8 (4.3%)    |                      |
| Sambaa                                      | 16 (3.0%)   | 3 (2.6%)   | 9 (3.9%)    | 4 (2.2%)    |                      |
| Nyaturu                                     | 17 (3.2%)   | 3 (2.6%)   | 13 (5.6%)   | 1 (0.5%)    |                      |
| Other African                               | 135 (25.3%) | 24 (20.7%) | 76 (32.8%)  | 35 (18.9%)  |                      |
| Non-African                                 | 1 (0.2%)    | 0 (0%)     | 0 (0%)      | 1 (0.5%)    |                      |
| <b>Personal Income (in TZS), missing: 3</b> |             |            |             |             | <b>&lt;0.001 ***</b> |
| 0 to 50000                                  | 176 (33.0%) | 20 (17.2%) | 66 (28.4%)  | 90 (48.6%)  |                      |
| 50001 to 100000                             | 70 (13.1%)  | 14 (12.1%) | 32 (13.8%)  | 24 (13.0%)  |                      |
| 100001 to 150000                            | 32 (6.0%)   | 7 (6.0%)   | 14 (6.0%)   | 11 (5.9%)   |                      |
| 150001 to 200000                            | 45 (8.4%)   | 13 (11.2%) | 22 (9.5%)   | 10 (5.4%)   |                      |
| >200000                                     | 207 (38.8%) | 61 (52.6%) | 97 (41.8%)  | 49 (26.5%)  |                      |
| <b>Household Income, missing: 3</b>         |             |            |             |             | <b>&lt;0.010 **</b>  |

|                                                         |             |             |             |             |       |
|---------------------------------------------------------|-------------|-------------|-------------|-------------|-------|
| 0 to 50000                                              | 47 (8.8%)   | 3 (2.6%)    | 14 (6.0%)   | 30 (16.2%)  |       |
| 50001 to 100000                                         | 56 (10.5%)  | 8 (6.9%)    | 18 (7.8%)   | 30 (16.2%)  |       |
| 100001 to 150000                                        | 31 (5.8%)   | 6 (5.2%)    | 5 (2.2%)    | 20 (10.8%)  |       |
| 150001 to 200000                                        | 63 (11.8%)  | 9 (7.8%)    | 35 (15.1%)  | 19 (10.3%)  |       |
| >200000                                                 | 333 (62.5%) | 89 (76.7%)  | 159 (68.5%) | 85 (45.9%)  |       |
| <b>Number of People in Household, <i>missing: 1</i></b> | 3.62 (1.79) | 3.55 (1.55) | 3.57 (1.93) | 3.71 (1.75) | 0.655 |

**Caption:** Unadjusted associations by Pregnancy Status. Data are shown as<sup>1</sup>N (%) for categorical variables and mean (SD) for continuous variables. Continuous data were compared using Analysis of Variance (ANOVA) type 3 sum of squares. Categorical data were compared using Pearson's chi-square test. The symbol (\*\*\*) denotes that a P value is statistically significant at the  $\alpha = 0.001$  level. The symbol (\*\*) denotes that a P value is statistically significant at the  $\alpha = 0.01$  level. The symbol (\*) denotes that a P value is statistically significant at the  $\alpha = 0.05$  level. For the variable *Tribe*, the sub-category of *Other African* primarily includes the following tribes: Iraq, Mmeru, Muha, among others not mentioned.



262 For ACDP, the majority (56.9%) of pregnant women reported complete abstinence, with the  
263 remainder drinking 1 to 2 times per week. Women not of childbearing age had higher rates of alcohol use,  
264 with 17.9% drinking 3 to 4 times per week. Of the pregnant women who drank, 32.8% consumed 1 to 2  
265 standard drinks in a single sitting and 9.5% consumed 3 to 4 standard drinks in a sitting. Non-pregnant  
266 women were more likely to drink 3 to 4 standard drinks in a single sitting (16.8% in non-pregnant, young  
267 women and 13.5% in non-pregnant, older women). Following increased alcohol use, more older, non-  
268 pregnant women (55.1%) reported attempts to quit alcohol than childbearing-aged non-pregnant women  
269 (41.4%), and pregnant women (33.6%). Few childbearing-aged non-pregnant women (6.5%) and non-  
270 childbearing-aged non-pregnant women (5.4%) sought treatment for their alcohol use. Younger, non-  
271 pregnant women had the highest mean AUDIT score (2.94), compared to older non-pregnant women  
272 (2.51) and pregnant women (1.70) (Table 2).

273 Compared to pregnant women, younger non-pregnant women reported experiencing significantly  
274 more alcohol-related consequences, with an average DrInC score of 6.73, followed by 5.25 in older non-  
275 pregnant females, and 3.15 in pregnant females (Table 2). Depression severity was also highest amongst  
276 older non-pregnant women, with an average PHQ-9 score of 7.25, followed by 5.85 in younger non-  
277 pregnant women and 4.71 in pregnant women (Table 2). Older non-pregnant women (31.4%) were much  
278 more likely to be classified as depressed, defined as a PHQ-9 score greater than or equal to 9 points.  
279 Similar proportions of all female subgroups report seeking treatment for psychiatric disease, with rates  
280 ranging from 5.9% to 12.5% (Table 2).

**Table 2: Alcohol Use Practices, Consequences and Depression Status by Pregnancy Status**

| <i>Alcohol Use Practices by Pregnancy Status</i>                            | <i>Overall<br/>(n = 533)</i> | <i>Pregnant<br/>(n = 116)</i> | <i>Not Pregnant,<br/>Child-bearing<br/>(n = 232)</i> | <i>Not Pregnant, Not<br/>Child-bearing<br/>(n = 185)</i> | <i>P Value</i>        |
|-----------------------------------------------------------------------------|------------------------------|-------------------------------|------------------------------------------------------|----------------------------------------------------------|-----------------------|
| <b>Drinking Frequency, (n,%), missing: 2</b>                                |                              |                               |                                                      |                                                          | <b>&lt; 0.001 ***</b> |
| 0 times/week                                                                | 243 (45.6%)                  | 66 (56.9%)                    | 115 (49.6%)                                          | 62 (33.5%)                                               |                       |
| 1 to 2 times/week                                                           | 227 (42.6%)                  | 45 (38.8%)                    | 93 (40.1%)                                           | 89 (48.1%)                                               |                       |
| 3 to 4 times/week                                                           | 43 (8.1%)                    | 4 (3.4%)                      | 20 (8.6%)                                            | 19 (10.3%)                                               |                       |
| 5 to 6 times/week                                                           | 4 (0.8%)                     | 0 (0%)                        | 2 (0.9%)                                             | 2 (1.1%)                                                 |                       |
| Everyday                                                                    | 14 (2.6%)                    | 0 (0%)                        | 2 (0.9%)                                             | 12 (6.5%)                                                |                       |
| <b>Drinking Quantity (# standard drinks per sitting), (n,%), missing: 1</b> |                              |                               |                                                      |                                                          | <b>&lt; 0.001 **</b>  |
| 0 standard drinks                                                           | 244 (45.8%)                  | 66 (56.9%)                    | 115 (49.6%)                                          | 63 (34.1%)                                               |                       |
| 1 to 2 standard drinks                                                      | 202 (37.9%)                  | 38 (32.8%)                    | 72 (31.0%)                                           | 92 (49.7%)                                               |                       |
| 3 to 4 standard drinks                                                      | 75 (14.1%)                   | 11 (9.5%)                     | 39 (16.8%)                                           | 25 (13.5%)                                               |                       |
| 5 to 6 standard drinks                                                      | 10 (1.9%)                    | 0 (0%)                        | 5 (2.2%)                                             | 5 (2.7%)                                                 |                       |
| >6 standard drinks                                                          | 1 (0.2%)                     | 0 (0%)                        | 1 (0.4%)                                             | 0 (0%)                                                   |                       |
| <b>Weekly Alcohol Expenses (TZS), (n,%), missing: 1</b>                     |                              |                               |                                                      |                                                          | <b>&lt;0.01 **</b>    |
| 0 to 10000                                                                  | 460 (86.3%)                  | 98 (84.5%)                    | 190 (81.9%)                                          | 172 (93.0%)                                              |                       |
| 10001 to 50000                                                              | 69 (12.9%)                   | 17 (14.7%)                    | 39 (16.8%)                                           | 13 (7.0%)                                                |                       |
| 50001 to 100000                                                             | 3 (0.6%)                     | 0 (0%)                        | 3 (1.3%)                                             | 0 (0%)                                                   |                       |
| <b>Alcohol Preferences, (n,%), missing: 1</b>                               |                              |                               |                                                      |                                                          | <b>&lt;0.001 ***</b>  |
| Wine                                                                        | 67 (12.6%)                   | 24 (20.7%)                    | 37 (15.9%)                                           | 6 (3.2%)                                                 |                       |
| Light Beer                                                                  | 38 (7.1%)                    | 8 (6.9%)                      | 24 (10.3%)                                           | 6 (3.2%)                                                 |                       |
| Beer                                                                        | 106 (19.9%)                  | 15 (12.9%)                    | 39 (16.8%)                                           | 52 (28.1%)                                               |                       |

medRxiv preprint doi: <https://doi.org/10.1101/2024.08.22.24312125>; this version posted August 22, 2024. The copyright holder for this preprint (which was not certified by peer review) is the author/funder, who has granted medRxiv a license to display the preprint in perpetuity. It is made available under a [CC-BY 4.0 International license](#).

|                                                                |             |             |             |             |                      |
|----------------------------------------------------------------|-------------|-------------|-------------|-------------|----------------------|
| Mbege (banana-based beer)                                      | 67 (12.6%)  | 2 (1.7%)    | 13 (5.6%)   | 52 (28.1%)  |                      |
| Other                                                          | 12 (2.4%)   | 0 (0%)      | 1 (0.4%)    | 6 (3.2%)    |                      |
| None                                                           | 240 (45.0%) | 66 (56.9%)  | 112 (48.3%) | 62 (33.5%)  |                      |
| <b>Attempted Quitting at any Time-Point, (n,%), missing: 4</b> |             |             |             |             | <b>&lt; 0.01 **</b>  |
| No                                                             | 292 (54.8%) | 75 (64.7%)  | 135 (58.2%) | 82 (44.3%)  |                      |
| Yes                                                            | 237 (44.5%) | 39 (33.6%)  | 96 (41.4%)  | 102 (55.1%) |                      |
| <b>Sought Treatment for Alcohol Use, (n,%), missing: 4</b>     |             |             |             |             | 0.063                |
| Yes                                                            | 25 (4.7%)   | 0 (0%)      | 15 (6.5%)   | 10 (5.4%)   |                      |
| No                                                             | 504 (94.6%) | 116 (100%)  | 215 (92.7%) | 173 (93.5%) |                      |
| <b>AUDIT Score, (mean, SD), missing: 0</b>                     | 2.55 (4.39) | 1.70 (3.28) | 2.94 (4.79) | 2.51 (4.36) | <b>0.045 *</b>       |
| <b>HHD Status, (n,%), missing: 0</b>                           |             |             |             |             | 0.092                |
| Yes                                                            | 69 (12.9%)  | 10 (8.6%)   | 38 (16.4%)  | 21 (11.4%)  |                      |
| No                                                             | 464 (87.1%) | 106 (91.4%) | 194 (83.6%) | 164 (88.6%) |                      |
| <b>DrInC Score, (mean, SD), missing: 0</b>                     | 5.44 (12.0) | 3.15 (8.97) | 6.73 (12.6) | 5.25 (12.7) | <b>0.030 *</b>       |
| <b>PHQ9 Score, (mean, SD), missing: 0</b>                      | 6.10 (4.87) | 4.71 (3.12) | 5.85 (4.80) | 7.29 (5.55) | <b>&lt;0.001 ***</b> |
| <b>Depression (PHQ-9 ≥9), (n,%), missing: 0</b>                |             |             |             |             | <b>&lt;0.001 ***</b> |
| Yes                                                            | 127 (23.8%) | 14 (12.1%)  | 55 (23.7%)  | 58 (31.4%)  |                      |
| No                                                             | 406 (76.2%) | 102 (87.9%) | 177 (76.3%) | 127 (68.6%) |                      |
| <b>Sought Psychiatric Treatment, (n,%), missing: 3</b>         |             |             |             |             | 0.094                |

|     |             |             |             |             |  |
|-----|-------------|-------------|-------------|-------------|--|
| Yes | 51 (9.4%)   | 11 (9.5%)   | 29 (12.5%)  | 11 (5.9%)   |  |
| No  | 487 (90.0%) | 105 (90.5%) | 200 (86.2%) | 174 (94.1%) |  |

**Caption:** Unadjusted associations with Alcohol Use Practices by Pregnancy Status. Data are shown as N (%) for categorical variables and mean (SD) for continuous variables. Continuous data were compared using Analysis of Variance (ANOVA) test with type 3 sum of squares. Categorical data were compared using Pearson’s chi-square test. The symbol (\*\*\*) denotes that a P value is statistically significant at the  $\alpha = 0.001$  level. The symbol (\*\*) denotes that a P value is statistically significant at the  $\alpha = 0.01$  level. The symbol (\*) denotes that a P value is statistically significant at the  $\alpha = 0.05$  level. For the variable *Alcohol Preferences*, the sub-category of *Other* primarily includes the following: Liquor/Spirits, Daddi, Ulanzi, Piwa, Gongo, Changaa, among others not mentioned.

283 Most (70.7%) women claimed that consuming 0 alcoholic drinks was the “safe amount” and reported ACDP is unacceptable throughout  
 284 all stages of pregnancy. In contrast, over a quarter of older non-pregnant women (25.9%) believed that 1 to 2 standard drinks was a “safe amount”  
 285 of alcohol while pregnant. (Table 3).

286  
 287  
 288

**Table 3. Survey-Reported Knowledge and Attitudes on Alcohol Use by Pregnancy Status**

| <i>Knowledge and Attitudes on Alcohol Use by Pregnancy Status</i>   | <i>Overall (n = 533)</i> | <i>Pregnant (n = 116)</i> | <i>Not Pregnant, Child-bearing (n = 232)</i> | <i>Not Pregnant, Not Child-bearing (n = 185)</i> | <i>P Value</i>       |
|---------------------------------------------------------------------|--------------------------|---------------------------|----------------------------------------------|--------------------------------------------------|----------------------|
| <b>Safe Amount of Alcohol While Pregnant, missing: 81</b>           |                          |                           |                                              |                                                  | <b>&lt;0.001 **</b>  |
| 0 standard drinks                                                   | 377 (70.7%)              | 83 (71.6%)                | 175 (75.4%)                                  | 119 (64.3%)                                      |                      |
| 1 to 2 standard drinks                                              | 70 (13.1%)               | 6 (5.2%)                  | 16 (6.9%)                                    | 48 (25.9%)                                       |                      |
| 3 to 4 standard drinks                                              | 3 (0.6%)                 | 0 (0%)                    | 1 (0.4%)                                     | 2 (1.1%)                                         |                      |
| ≥10 standard drinks                                                 | 2 (0.4%)                 | 1 (0.9%)                  | 0 (0%)                                       | 1 (0.5%)                                         |                      |
| <b>When Alcohol Use is Acceptable During Pregnancy, missing: 85</b> |                          |                           |                                              |                                                  | <b>&lt;0.001 ***</b> |
| It is never okay                                                    | 370 (69.4%)              | 85 (73.3%)                | 171 (73.7%)                                  | 114 (61.6%)                                      |                      |
| Beginning of pregnancy                                              | 17 (3.2%)                | 1 (0.9%)                  | 7 (3.0%)                                     | 9 (4.9%)                                         |                      |
| Middle of pregnancy                                                 | 7 (1.3%)                 | 0 (0%)                    | 3 (1.3%)                                     | 4 (2.2%)                                         |                      |

|                                                       |                            |                          |                           |                           |       |
|-------------------------------------------------------|----------------------------|--------------------------|---------------------------|---------------------------|-------|
| End of pregnancy<br>It is okay at any time            | 16 (3.0%)<br>38 (7.1%)     | 1 (0.9%)<br>2 (1.7%)     | 5 (2.2%)<br>6 (2.6%)      | 10 (5.4%)<br>30 (16.2%)   |       |
| <b>Perceived Alcohol Use as Unhealthy, missing: 8</b> |                            |                          |                           |                           | 0.068 |
| Yes<br>No                                             | 363 (68.1%)<br>162 (30.4%) | 67 (57.8%)<br>47 (40.5%) | 166 (71.6%)<br>62 (26.7%) | 130 (70.3%)<br>53 (28.6%) |       |

**Caption:** Unadjusted associations with Knowledge and Attitudes on Alcohol Use by Pregnancy Status. Data are shown as<sup>1</sup>N (%) for categorical variables and mean (SD) for continuous variables. Continuous data were compared using Analysis of Variance (ANOVA) test with type 3 sum of squares. Categorical data were compared using Pearson's chi-square test. The symbol (\*\*\*) denotes that a P value is statistically significant at the  $\alpha = 0.001$  level. The symbol (\*\*) denotes that a P value is statistically significant at the  $\alpha = 0.01$  level. The symbol (\*) denotes that a P value is statistically significant at the  $\alpha = 0.05$  level.

## 290 **Qualitative Results**

291  
292 Ten women and nine men completed an IDI. Out of the 10 women who participated in the IDIs,  
293 two had never been pregnant, two were pregnant at the time of the interview, and six had been pregnant in  
294 the past. Quotes drawn from these 10 women were labelled according to pregnancy status, as either  
295 ‘Current Pregnancy’, ‘Past Pregnancy’, or ‘Never Pregnant’. Of the 9 men who participated in IDIs, all  
296 had either witnessed PWCA in their local communities or had cohabited with their pregnant female  
297 partner in a registered or unregistered marriage.

298 IDI participants ranged from 20 to 70 years old, with marital statuses including single or never  
299 married, married, divorced, and widowed and education statuses from primary to college level. Alcohol  
300 consumption patterns ranged from complete abstinence to frequent consumption, such as 3 to 4 bottles per  
301 sitting nearly 5 to 6 times per week. Three themes were inductively and deductively identified from the 19  
302 interviews: (1) Observation of ACDP in Moshi, including its commonality, (2) Knowledge of the  
303 consequences related to alcohol use during pregnancy, such as the influence of cultural beliefs and  
304 perceived harms, and (3) Community attitudes regarding PWCA.

305  
306 **Table 4: Qualitative Themes and Sub-Themes Regarding Alcohol Use and Pregnancy**

| Themes                                                                       | Sub-Themes                                                                   |
|------------------------------------------------------------------------------|------------------------------------------------------------------------------|
| <b>Observations of ACDP in Moshi</b>                                         | Commonality of ACDP in Moshi due to widespread disbelief of associated harms |
| <b>Knowledge of the consequences related to alcohol use during pregnancy</b> | Perceived cultural benefits of ACDP and delivery                             |
|                                                                              | Perceived harms of ACDP                                                      |
| <b>Community attitudes regarding PWCA</b>                                    | Negative community views of ACDP                                             |
|                                                                              | Rationalizations for why pregnant women consume alcohol                      |

308  
309 **Observations of ACDP in Moshi**

310  
311 *Commonality of ACDP in Moshi due to widespread disbelief of associated harms*  
312 Over half of the IDI participants noted that it was “*quite common to see a pregnant woman*  
313 *drinking alcohol*” (IDI #6, Female, Past Pregnancy) in Moshi, with almost half of female interviewees  
314 reporting alcohol consumption themselves during a current, or past pregnancy. One participant recalled:  
315 “*When I was pregnant, I used to go to the clinic and being told not to drink alcohol but when I*  
316 *returned home, I continued to drink alcohol as usual*” (IDI #6, Female, Past Pregnancy)  
317 Another female respondent shared her observations of PWCA, which shaped her own alcohol use.  
318 “*I have seen many [pregnant women] who use alcohol, some of them even drink a lot of beer*  
319 *bottles but I have never witnessed any of them getting any bad effect even after delivery ...*  
320 *Drinking wine helps me with my health, such as in food digestion process. That’s why I decided*  
321 *to continue drinking even when pregnant ... I will drink just 2 glasses of wine per week. It’s such*  
322 *a little amount that am sure cannot bring harm to my baby.*” (IDI #19, Female, Current Pregnancy)  
323 Several other participants witnessed a lack of observed adverse consequences when consuming  
324 alcohol, which appeared to contribute to the commonality of this practice in Moshi. This sentiment is  
325 accurately summarized by one participant who highlights that a mother gave birth to a healthy baby after  
326 consuming alcohol throughout her pregnancy.  
327 “*There was a woman; when she was pregnant, she drank so much alcohol. One day, the baby*  
328 *turned up, we brought her here to KCMC hospital. She was drunk and she was told it was still not*  
329 *the time to give birth. She returned home and continued drinking alcohol until her delivery, yet*  
330 *she still gave birth to a healthy baby.*” (IDI #6, Female, Past Pregnancy)  
331 Another participant had a similar sentiment, which describes how a mother gave birth to an unhealthy  
332 baby while not drinking during pregnancy and a healthy baby while drinking during pregnancy.  
333 “*During the first pregnancy, she did everything ... she had to do, she even stopped drinking*  
334 *alcohol but the baby was still born with problems. After giving birth to the first child, she started*

335 *to drink alcohol, even when she was pregnant with the second child... She refused to stop drinking*  
336 *alcohol until she gave birth...and she had a normal child with no problems” (IDI #9, Female, Past*  
337 *Pregnancy)*

338 These results highlight the commonality of alcohol use during pregnancy in Moshi Tanzania due  
339 to unobserved harms with the practice. In contrast to these excerpts, the remaining IDI participants stated  
340 that ACDP was “*not a common practice*” (IDI #11, Male) in Moshi due to community sensitization to  
341 alcohol-related harms on the mother and fetus, whereby “*people are aware of the effects of alcohol during*  
342 *pregnancy*” (IDI #11, Male) and “*they understand the effects of alcohol*” (IDI #5, Male)

344  
345 **Knowledge of consequences related to alcohol use during pregnancy**

346 *Perceived cultural benefits of ACDP and delivery*

347 Cultural beliefs surrounding ACDP had both tribal and cultural origins. For example, nearly a  
348 quarter of participants highlighted that members of the Chagga tribe encouraged moderate alcohol  
349 consumption before, during, and after delivery. These norms encouraged pregnant women to “*sip a small*  
350 *amount of alcohol,*” (IDI #8, Male), as this was thought to provide benefit to the pregnant female and  
351 unborn child. Specifically, it was thought that alcohol would “*help the baby [to] grow big and become*  
352 *active,*” (IDI #11, Male) with participants encouraging alcohol use “*at the middle of pregnancy*” because  
353 “*at that stage, the baby should grow and be strong before delivery*” (IDI #8, Male)

354 Participants likewise highlighted numerous perceived benefits of alcohol use during labor,  
355 including providing the mother with “*increased power*” (IDI #7, Female, Past Pregnancy) to push the baby  
356 through the birth canal, alleviating stress, “[*reducing*] *labor pain*” (IDI #14, Male) and “*abdominal*  
357 *cramps*” (IDI #12, Male), and “*increase milk production for my baby to breastfeed*” (IDI #7, Female, Past  
358 Pregnancy). One female interviewee elaborated on milk production, recounting that:

359 “*There is a notion where I live that taking alcohol during and after delivery increases milk*  
360 *production and eventually the baby gets enough milk to breastfeed...after my third delivery where*



361 *my grandmother insisted for me to take it in order to increase milk production for my baby to*  
362 *breastfeed.” (IDI #7, Female, Past Pregnancy)*

363 These beliefs, however, were not characteristic of all parts of Moshi. One participant highlights a  
364 distinct discrepancy between village views and town views concerning PWCA, explaining that ACDP is  
365 prevalent and accepted only in certain cultural contexts:

366 *“The community views [PWCA] differently. If you ask people from the village, they would say its*  
367 *right, but in town, because people are aware of the effect of alcohol, you may find few of them*  
368 *who drink ...” (IDI #14, Male)*

369 These results highlight the underlying cultural beliefs on the benefits of consuming alcohol during  
370 pregnancy that may be influencing consumption patterns.

371  
372 *Perceived harms of ACDP*

373 While cultural influence may support the use of alcohol during pregnancy, many participants  
374 noted substantial harms of ACDP on the developing fetus, including premature birth, fetal anomalies, and  
375 nutritional deficiencies. Additionally, respondents also expressed these harms extend to the mother,  
376 including a detrimental impact on mental health and motor functioning. One respondent notes:

377 *“The baby may be born with some abnormalities such as blindness, mental problems or born*  
378 *prematurely. I have seen one female who was drinking during pregnancy, and she end up*  
379 *delivering a premature baby.” (IDI #11, Male)*

380 Several participants also reported that ACDP contributed to the development of blindness,  
381 neurological, cognitive, and motor disabilities. Of equal concern, a handful of participants suggested that  
382 alcohol-induced appetite loss in expectant mothers could lead to nutritional deficiencies hindering proper  
383 fetal development.

384 *“Alcohol sometimes causes someone to lose appetite, it depends on the type of alcohol you drink.*  
385 *You may drink alcohol and fail to eat properly, and harm the baby or the mother can get*  
386 *anemia.” (IDI #9, Female, Past Pregnancy)*

387 The impact of alcohol use was seen to extend into the postnatal period. About a quarter of interviewees  
388 cautioned against alcohol use during breastfeeding, noting that “*it will have impact on child’s mental and*  
389 *motor development and eventually restricts normal and proper growth of that child*” (IDI #7, Female, Past  
390 Pregnancy).

391 These risks extended to the mother as well, with a fifth of interviewees asserting that ACDP can  
392 have a detrimental impact on female health, including engaging in unsafe sexual behaviors or disrupting  
393 motor function, where an intoxicated pregnant women may “*fall down and injure the stomach...[with] a*  
394 *possibility of terminating pregnancy*” (IDI #14, Male). As one interviewee explained:

395 “*In general, alcohol consumption during pregnancy is not good for a pregnant woman to drink*  
396 *too much alcohol. When got drunkard she can do unprotected sex with someone she does not*  
397 *know and put herself at risk of sexual transmitted infections or AIDS during pregnancy.*” (IDI #9,  
398 Female, Past Pregnancy)

399 Finally, a few interviewees emphasized the importance of adequate education on the detrimental  
400 effects of ACDP, noting that “[*Women*] are always ready to try their best when they are given right  
401 *knowledge and education about the consequences of alcohol to themselves until delivery time and to their*  
402 *unborn babies*” (IDI #16, Female, Never Pregnant).

## 403 **Community attitudes regarding PWCA**

### 404 *Negative community views of ACDP*

405 Generally, community perspectives cast PWCA in a negative light. Most IDI participants claimed  
406 that ACDP was prohibited and engaging in such behaviors would quickly attract social disapproval. To  
407 avoid censure, one respondents specifically mentioned that PWCA tended to “*drink privately*” (IDI #8,  
408 Male). Interviewees described that PWCA are viewed as incapable of suppressing alcoholic urges and of  
409 making sacrifices for the sake of her child. This shared community attitude was epitomized by the  
410 language used by respondents to describe PWCA who “*does not wish good for her baby*” (IDI #3, Female,  
411 Never Pregnant). Participants claimed that the community views PWCA as “*foolish*” (IDI #10, Female,

412 Never Pregnant) and “*taboo*,” (IDI #9, Female, Past Pregnancy) whereby alcohol consumption while  
413 pregnant is “*careless*” (IDI #3, Female, Never Pregnant). Additionally, one participant stated, “*The*  
414 *community perceive them as ‘risk taker’, ‘don’t care’ they can even be isolated in the community,*” (IDI  
415 #4, Male) thereby demonstrating the profound influence of these adverse community perceptions on  
416 PWCA.

417 Several participants compared PWCA to non-pregnant women who consume alcohol, implying  
418 that PWCA are viewed particularly poorly. Specifically, participants posited that since pregnant women  
419 actively “*agreed to conceive*,” (IDI #9, Female, Past Pregnancy) they and their partner bore the  
420 responsibility of ensuring the well-being and health of themselves, and of the unborn child. For example,  
421 participants remarked that “*whether she is educated or not education, a pregnant woman drinking alcohol*  
422 *will seem it is it so wrong*” (IDI #9, Female, Past Pregnancy) and when a woman drinks while pregnant,  
423 “*[the community] normally does some traditional ritual to her*” (IDI #11, Male).

#### 424 ***Rationalizations for why pregnant women consume alcohol***

425 Several factors, collectively, were rationalized by participants to cause a pregnant woman to  
426 either increase, decrease, or altogether abstain from alcohol consumption during pregnancy. First, nearly  
427 half of the interviewees associated ACDP with an inability to stop consumption due to pre-existing  
428 alcohol dependency, with stress that occurred before a woman was pregnant was hypothesized to underlie  
429 pre-pregnancy alcohol use.

430 “*Some of them were good drinkers even before pregnancy therefore its not easy for them to stop*  
431 *abruptly during pregnancy... I think it’s just because she was already used to taking alcohol*  
432 *regularly when she wasn’t pregnant and she failed to stop using.*” (IDI #3, Female, Never  
433 Pregnant)

434 “*For sure I have no idea of why she takes alcohol at that [perinatal] period, but I know she has*  
435 *been using all that since long time ago, at some point she had family conflicts with her husband*  
436 *which may be one of the reasons*” (IDI #7, Female, Past Pregnancy)

437 Moreover, participants held the belief that pregnant women are likely to increase alcohol consumption if  
438 they experienced an unexpected pregnancy while unmarried. Such situations were thought to induce stress  
439 and societal pressures for these expectant mothers, as elucidated by one participant's remark:

440 *“We have one problem in our community, most men run away once they have [kids]. So due to*  
441 *stress, this women start or increase the amount of drinking alcohol”* (IDI #18, Male)

442 Second, over a quarter of participants believed that pregnancy hormones may cause a “*strong*  
443 *desire and cravings*” (IDI #3, Female, Never Pregnant) for certain foods and drinks, including alcohol. For  
444 example, one participant explained how pregnancy cravings may influence alcohol use:

445 *“There are quite a number of pregnant women who take alcohol. Depending on their desires and*  
446 *pregnancy cravings, some drink a lot, others due to pregnancy don’t even want to smell*  
447 *[alcohol], others remain using as they were before”* (IDI #7, Female, Past Pregnancy)

448 While generally condoned, continued reasons for ACDP remain complex and multi-faceted.

#### 449 **4 DISCUSSION**

450 This study aimed to explore perceptions and assess current rates of alcohol use among pregnant  
451 women in Moshi. To the best of our knowledge, this is one of the first studies using a mixed-methods  
452 approach to closely examine community attitudes around ACDP in Moshi, Tanzania.- Our analysis found  
453 that rates of alcohol use among pregnant women in Moshi remain high, with the biggest predictor of  
454 ACDP being pre-pregnancy alcohol use. While overall, the community held negative views around  
455 cultural beliefs and believed women should not drink at any point in their pregnancy, some sociocultural  
456 beliefs encouraged ACDP. The high rates of alcohol use and complex factors influencing use point to the  
457 need for robust community-wide health messaging coupled with patient-level, pre-pregnancy education  
458 and holistic support in order to reduce this generational harm.

459 ACDP in Moshi remains notably elevated. We found that 42% of pregnant women attending  
460 KCMC’s ED and RHC consume alcohol weekly, drinking 1 to 2 standard drinks of alcohol per sitting,  
461 with previous alcohol use being most associated with use during pregnancy. Our qualitative results

462 supported the commonality of ACDP, with this behavior noted to be frequently observed in local  
463 communities, spurred by a lack of observed consequences. These rates are significantly higher than  
464 previous, nearby studies that found ACDP to be 20% in Northern Tanzania and 15% in neighboring  
465 Dodoma <sup>14,16</sup>. These findings, particularly the ubiquitousness of ACDP, are cause for concern given  
466 existing recommendations that pregnant women should abstain from alcohol entirely <sup>13</sup>. Populations  
467 exhibiting high rates of alcohol consumption are typically associated with a high prevalence of FASD <sup>9-12</sup>;  
468 however, within Tanzania, like most of SSA, the true prevalence of FASD is not well understood and  
469 corresponding literature is rare<sup>42</sup>. FASD and other alcohol-related congenital anomalies typically develop  
470 early in pregnancy, often before women realize they are pregnant. Importantly, alcohol use behaviors  
471 before pregnancy were identified as predicting ACDP as revealed in IDIs, with several participants noting  
472 pre-pregnancy alcohol habits to be the primary reason for continued alcohol use. This is especially  
473 important to consider as young women who are currently not, but may become pregnant, exhibited higher  
474 levels of alcohol use (AUDIT = 2.94) and alcohol-related consequences (DrInC = 6.73), than other female  
475 subgroups. Previous studies have identified pre-pregnancy alcohol use among young women to be a  
476 significant predictor of alcohol use during pregnancy <sup>14,43</sup>, with literature noting that the minimization of  
477 these habits are key in reducing ACDP <sup>14</sup>.

478         In both our quantitative and qualitative analysis, ACDP was generally censured, however,  
479 sociocultural and community observations and beliefs underlied continued alcohol use during pregnancy.  
480 Survey data revealed that 70% of participants found any amount of alcohol to be unsafe at any point  
481 during pregnancy, a finding qualitatively supported by the general negative community views of PWCA  
482 and notable mentioned harms of this behavior. The observed societal stigma towards women who drink,  
483 regardless of pregnancy, warrants further investigation to determine if this stigma is more profound in  
484 pregnancy, or applies generally to all women. Aside from previous alcohol use, IDI responses provided a  
485 more nuanced understanding of why ACDP continued within Moshi, mentioning stress, addiction, and  
486 observations of other women who drank and gave birth to healthy children. It is imperative to note that  
487 accessing mental health support is challenging in Moshi, Tanzania, particularly for women; only a small

488 percentage of women (9.4%) sought psychiatric treatment programs, despite a high prevalence of  
489 depression (23.8%). Marlow et al. similarly found cultural beliefs played a role in alcohol use among  
490 pregnant women in Lesotho and echoed the sentiment of alcohol as protective for the unborn baby<sup>44</sup>.  
491 Previous literature has also found stress and depression to be highly prevalent in women from SSA both  
492 during and after pregnancy<sup>45-47</sup>, with stress also linked to increased alcohol consumption both in this  
493 region and worldwide<sup>48-51</sup>. The influence of stress and addiction underlying ACDP points to a need for  
494 future programming to incorporate components of mental healthcare, including improved availability and  
495 access to mental healthcare, and the minimization of alcohol use among both pregnant and non-pregnant  
496 women of childbearing age<sup>49,52-55</sup>.

497         These factors illustrate the necessity of increased community-wide health messaging centered  
498 around the dangers of ACDP, coupled with patient-level, pre-pregnancy education and holistic support for  
499 women of childbearing age. For example, our analysis found that persistent beliefs, painting ACDP as  
500 beneficial exist, illustrating that a gap remains in community education and practice. This call to action  
501 joins other literature, which similarly has identified high rates of alcohol use during pregnancy in SSA, to  
502 put greater focus on developing and implementing behavioral interventions<sup>56</sup>. Interventions to reduce  
503 ACDP have been tried and tested worldwide, with formats being primarily medical-, psychosocial-, and  
504 education-centered<sup>57</sup>. The most effective interventions for pregnant women were psychosocial-based,  
505 specifically brief interventions (BIs), which is a focused, motivational interview delivered directly to the  
506 patient and can be readily incorporated into prenatal care visits<sup>58</sup>. This intervention type may be  
507 especially useful in Moshi, as BIs have been shown to be particularly effective in resource-constrained  
508 settings, requiring little cost to operate and can be performed by lay healthcare workers<sup>59</sup>. Future  
509 programming in this region should incorporate both increased community messaging while also  
510 delivering effective education and support directly to expectant mothers.

511         Local policy efforts should be aware of the high rates of alcohol use still present in Moshi and re-  
512 focus health priorities on mitigating this preventable harm. Additionally, to better inform the creation of  
513 appropriate interventions and programming, future studies should investigate the extent of current

514 alcohol-related fetal harm in Tanzania to ensure the most impactful prevention strategies are utilized.

515 Through these strategies, alcohol-related harm can be mitigated, with improved health outcomes for

516 present and future generations.

## 517 **Strengths and Limitations**

518 The primary limitations of this study include selection bias, as the population was recruited solely

519 from one health facility in Moshi, which may not adequately represent the broader Moshi community, and

520 recall bias, as alcohol use behaviors were self-reported through surveys. That being said, this one hospital

521 evaluation will serve as a contextual framework for an implementation study and further literature about

522 barriers to alcohol harm reduction in low resource settings. Additionally, it is important to acknowledge

523 the uncertainty surrounding the observed prevalence of pregnant women who consume alcohol (42.5%)

524 given the limited size of our sample of pregnant women (n = 116).

## 525 **5 CONCLUSION**

526 Our study highlights both current high rates of alcohol consumption among pregnant women in

527 Moshi, a behavior shaped in part by cultural beliefs and practices, alongside negative community attitudes

528 towards these individuals. Stress coping, existing alcohol dependency, and pregnancy-related cravings

529 constitute additional motivations for alcohol consumption among pregnant women. These findings stress

530 the need for future supportive, education-based programming for young women of childbearing age.

531 More holistic pregnancy-related healthcare services and infrastructure in this region may be the solution

532 to curbing alcohol use and improving health outcomes within the Moshi community.

## 533 6 REFERENCES

- 534 1. Organization WH. *Global Status Report on Alcohol and Health 2018*. World Health  
535 Organization; 2019.
- 536 2. Shield K, Manthey J, Rylett M, et al. National, regional, and global burdens of disease from  
537 2000 to 2016 attributable to alcohol use: a comparative risk assessment study. *Lancet*  
538 *Public Health*. 2020;5(1):e51-e61. doi:10.1016/S2468-2667(19)30231-2
- 539 3. Henderson J, Gray R, Brocklehurst P. Systematic review of effects of low-moderate prenatal  
540 alcohol exposure on pregnancy outcome. *BJOG Int J Obstet Gynaecol*. 2007;114(3):243-  
541 252. doi:10.1111/j.1471-0528.2006.01163.x
- 542 4. Muggli E, Matthews H, Penington A, et al. Association Between Prenatal Alcohol Exposure  
543 and Craniofacial Shape of Children at 12 Months of Age. *JAMA Pediatr*. 2017;171(8):771.  
544 doi:10.1001/jamapediatrics.2017.0778
- 545 5. Popova S, Lange S, Probst C, Gmel G, Rehm J. Estimation of national, regional, and global  
546 prevalence of alcohol use during pregnancy and fetal alcohol syndrome: a systematic  
547 review and meta-analysis. *Lancet Glob Health*. 2017;5(3):e290-e299. doi:10.1016/S2214-  
548 109X(17)30021-9
- 549 6. Popova S, Lange S, Probst C, et al. Actual and predicted prevalence of alcohol  
550 consumption during pregnancy in the WHO African Region. *Trop Med Int Health*.  
551 2016;21(10):1209-1239. doi:10.1111/tmi.12755
- 552 7. Denny L, Coles S, Blitz R. Fetal Alcohol Syndrome and Fetal Alcohol Spectrum Disorders.  
553 2017;96(8).
- 554 8. Wozniak JR, Riley EP, Charness ME. Clinical presentation, diagnosis, and management of  
555 fetal alcohol spectrum disorder. *Lancet Neurol*. 2019;18(8):760-770. doi:10.1016/S1474-  
556 4422(19)30150-4
- 557 9. Popova S, Lange S, Probst C, Gmel G, Rehm J. Global prevalence of alcohol use and  
558 binge drinking during pregnancy, and fetal alcohol spectrum disorder. *Biochem Cell Biol*.  
559 2018;96(2):237-240. doi:10.1139/bcb-2017-0077
- 560 10. May PA, Gossage JP, Marais AS, et al. The epidemiology of fetal alcohol syndrome and  
561 partial FAS in a South African community. *Drug Alcohol Depend*. 2007;88(2):259-271.  
562 doi:10.1016/j.drugalcdep.2006.11.007
- 563 11. Urban M, Chersich MF, Fourie LA, Chetty C, Olivier L, Viljoen D. Fetal alcohol syndrome  
564 among grade 1 schoolchildren in Northern Cape Province: prevalence and risk factors.  
565 *South Afr Med J Suid-Afr Tydskr Vir Geneeskde*. 2008;98(11):877-882.
- 566 12. VILJOEN DL, PHILLIP GOSSAGE J, BROOKE L, et al. Fetal Alcohol Syndrome  
567 Epidemiology in a South African Community: A Second Study of a Very High Prevalence  
568 Area. *J Stud Alcohol*. 2005;66(5):593-604.
- 569 13. Schölin L. Prevention of harm caused by alcohol in pregnancy. Published online 2016.
- 570 14. Mpelo M, Kibusi SM, Moshi F, Nyundo A, Ntwenya JE, Mpondo BCT. Prevalence and  
571 Factors Influencing Alcohol Use in Pregnancy among Women Attending Antenatal Care in  
572 Dodoma Region, Tanzania: A Cross-Sectional Study. *J Pregnancy*. 2018;2018:8580318.  
573 doi:10.1155/2018/8580318
- 574 15. Meier BJ, El-Gabri D, K F, et al. Perceptions of alcohol use among injury patients and their  
575 family members in Tanzanian society. *Alcohol Fayettev N*. 2020;83:9-15.  
576 doi:10.1016/j.alcohol.2019.06.001
- 577 16. Isaksen AB, Østbye T, Mmbaga BT, Daltveit AK. Alcohol consumption among pregnant  
578 women in Northern Tanzania 2000–2010: a registry-based study. *BMC Pregnancy*  
579 *Childbirth*. 2015;15(1):205. doi:10.1186/s12884-015-0630-0
- 580 17. Pauley A, Buono M, West K, et al. A mixed-methods comparison of gender differences in  
581 alcohol consumption and drinking characteristics among patients in Moshi, Tanzania. *PLOS*



- 582 *Glob Public Health*. 2023;3(10):e0002009. doi:10.1371/journal.pgph.0002009
- 583 18. Staton CA, Msilanga D, Kiwango G, et al. A prospective registry evaluating the  
584 epidemiology and clinical care of traumatic brain injury patients presenting to a regional  
585 referral hospital in Moshi, Tanzania: challenges and the way forward. *Int J Inj Contr Saf*  
586 *Promot*. 2017;24(1):69-77. doi:10.1080/17457300.2015.1061562
- 587 19. Organization WH. International guide for monitoring alcohol consumption and related harm.  
588 Published online 2000. Accessed March 6, 2024.  
589 [https://policycommons.net/artifacts/577662/international-guide-for-monitoring-alcohol-](https://policycommons.net/artifacts/577662/international-guide-for-monitoring-alcohol-consumption-and-related-harm/1556488/)  
590 [consumption-and-related-harm/1556488/](https://policycommons.net/artifacts/577662/international-guide-for-monitoring-alcohol-consumption-and-related-harm/1556488/)
- 591 20. Saunders JB, Aasland OG, Babor TF, de la Fuente JR, Grant M. Development of the  
592 Alcohol Use Disorders Identification Test (AUDIT): WHO Collaborative Project on Early  
593 Detection of Persons with Harmful Alcohol Consumption--II. *Addict Abingdon Engl*.  
594 1993;88(6):791-804. doi:10.1111/j.1360-0443.1993.tb02093.x
- 595 21. Skipsey K, Burleson JA, Kranzler HR. Utility of the AUDIT for identification of hazardous or  
596 harmful drinking in drug-dependent patients. *Drug Alcohol Depend*. 1997;45(3):157-163.  
597 doi:10.1016/s0376-8716(97)01353-7
- 598 22. Km C, Wd H, Jb S. The AUDIT questionnaire: choosing a cut-off score. Alcohol Use  
599 Disorder Identification Test. *Addict Abingdon Engl*. 1995;90(10). doi:10.1046/j.1360-  
600 0443.1995.901013496.x
- 601 23. Lundin A, Hallgren M, Balliu N, Forsell Y. The use of alcohol use disorders identification test  
602 (AUDIT) in detecting alcohol use disorder and risk drinking in the general population:  
603 validation of AUDIT using schedules for clinical assessment in neuropsychiatry. *Alcohol Clin*  
604 *Exp Res*. 2015;39(1):158-165. doi:10.1111/acer.12593
- 605 24. Piccinelli M, Tessari E, Bortolomasi M, et al. Efficacy of the alcohol use disorders  
606 identification test as a screening tool for hazardous alcohol intake and related disorders in  
607 primary care: a validity study. *BMJ*. 1997;314(7078):420-420.  
608 doi:10.1136/bmj.314.7078.420
- 609 25. Vissoci JRN, Hertz J, El-Gabri D, et al. Cross-Cultural Adaptation and Psychometric  
610 Properties of the AUDIT and CAGE Questionnaires in Tanzanian Swahili for a Traumatic  
611 Brain Injury Population. *Alcohol Alcohol*. 2018;53(1):112-120. doi:10.1093/alcalc/agx058
- 612 26. Reid MC, Fiellin DA, O'Connor PG. Hazardous and Harmful Alcohol Consumption in  
613 Primary Care. *Arch Intern Med*. 1999;159(15):1681. doi:10.1001/archinte.159.15.1681
- 614 27. Kirouac M, Witkiewitz K. Revisiting the Drinker Inventory of Consequences: An extensive  
615 evaluation of psychometric properties in two alcohol clinical trials. *Psychol Addict Behav*.  
616 2018;32(1):52-63. doi:10.1037/adb0000344
- 617 28. Miller WR. *The Drinker Inventory of Consequences (DrInC): An Instrument for Assessing*  
618 *Adverse Consequences of Alcohol Abuse : Test Manual*. U.S. Department of Health and  
619 Human Services, Public Health Service, National Institutes of Health, National Institute on  
620 Alcohol Abuse and Alcoholism; 1995.
- 621 29. Zhao D, Staton CA, He Q, Mmbaga BT, Vissoci JRN. Cross-Culture Adaptation and  
622 Psychometric Properties of the DrInC Questionnaire in Tanzanian Swahili. *Front Public*  
623 *Health*. 2018;6:330. doi:10.3389/fpubh.2018.00330
- 624 30. Kroenke K, Spitzer RL, Williams JB. The PHQ-9: validity of a brief depression severity  
625 measure. *J Gen Intern Med*. 2001;16(9):606-613. doi:10.1046/j.1525-  
626 1497.2001.016009606.x
- 627 31. Kroenke K, Spitzer RL. The PHQ-9: A New Depression Diagnostic and Severity Measure.  
628 *Psychiatr Ann*. 2002;32(9):509-515. doi:10.3928/0048-5713-20020901-06
- 629 32. Spitzer RL, Kroenke K, Williams JB. Validation and utility of a self-report version of PRIME-  
630 MD: the PHQ primary care study. Primary Care Evaluation of Mental Disorders. Patient  
631 Health Questionnaire. *JAMA*. 1999;282(18):1737-1744. doi:10.1001/jama.282.18.1737
- 632 33. Gelaye B, Williams MA, Lemma S, et al. Validity of the Patient Health Questionnaire-9 for

- 633 depression screening and diagnosis in East Africa. *Psychiatry Res.* 2013;210(2):653-661.  
634 doi:10.1016/j.psychres.2013.07.015
- 635 34. Manea L, Gilbody S, McMillan D. Optimal cut-off score for diagnosing depression with the  
636 Patient Health Questionnaire (PHQ-9): a meta-analysis. *CMAJ Can Med Assoc J.*  
637 2012;184(3):E191-E196. doi:10.1503/cmaj.110829
- 638 35. Smith Fawzi MC, Ngakongwa F, Liu Y, et al. Validating the Patient Health Questionnaire-9  
639 (PHQ-9) for screening of depression in Tanzania. *Neurol Psychiatry Brain Res.* 2019;31:9-  
640 14. doi:10.1016/j.npbr.2018.11.002
- 641 36. Gilbody S, Richards D, Brealey S, Hewitt C. Screening for depression in medical settings  
642 with the Patient Health Questionnaire (PHQ): a diagnostic meta-analysis. *J Gen Intern Med.*  
643 2007;22(11):1596-1602. doi:10.1007/s11606-007-0333-y
- 644 37. Grady MP. *Qualitative and Action Research: A Practitioner Handbook.* Phi Delta Kappa  
645 Educational Foundation; 1998.
- 646 38. Ritchie J, ed. *Qualitative Research Practice: A Guide for Social Science Students and*  
647 *Researchers.* Repr. SAGE; 2011.
- 648 39. Hennink M, Kaiser BN. Sample sizes for saturation in qualitative research: A systematic  
649 review of empirical tests. *Soc Sci Med.* 2022;292:114523.  
650 doi:10.1016/j.socscimed.2021.114523
- 651 40. Bryant A, Charmaz K. *The SAGE Handbook of Grounded Theory: Paperback Edition.* SAGE  
652 Publications; 2010.
- 653 41. Glaser BG, Strauss AL. *The Discovery of Grounded Theory: Strategies for Qualitative*  
654 *Research.* Aldine Transaction; 1967.
- 655 42. Adnams CM. Fetal alcohol spectrum disorder in Africa. *Curr Opin Psychiatry.*  
656 2017;30(2):108-112. doi:10.1097/YCO.0000000000000315
- 657 43. Ethen MK, Ramadhani TA, Scheuerle AE, et al. Alcohol Consumption by Women Before  
658 and During Pregnancy. *Matern Child Health J.* 2009;13(2):274-285. doi:10.1007/s10995-  
659 008-0328-2
- 660 44. Marlow M, Christie H, Skeen S, et al. Alcohol use during pregnancy in rural Lesotho: "There  
661 is nothing else except alcohol." *Soc Sci Med.* 2021;291:114482.  
662 doi:10.1016/j.socscimed.2021.114482
- 663 45. Assael MI, Namboze JM, German GA, Bennett FJ. Psychiatric disturbances during  
664 pregnancy in a rural group of African women. *Soc Sci Med 1967.* 1972;6(3):387-395.  
665 doi:10.1016/0037-7856(72)90109-6
- 666 46. Atuhaire C, Brennaman L, Cumber SN, Rukundo GZ, Nambozi G. The magnitude of  
667 postpartum depression among mothers in Africa: a literature review. *Pan Afr Med J.*  
668 2020;37(1). Accessed November 25, 2023.  
669 <https://www.ajol.info/index.php/pamj/article/view/212751>
- 670 47. Harris B. "Maternity Blues" in East African Clinic Attenders. *Arch Gen Psychiatry.*  
671 1981;38(11):1293-1295. doi:10.1001/archpsyc.1981.01780360109013
- 672 48. Anthenelli RM. Overview: Stress and Alcohol Use Disorders Revisited. *Alcohol Res Curr*  
673 *Rev.* 2012;34(4):386.
- 674 49. DAWSON DA, GRANT BF, RUAN WJ. THE ASSOCIATION BETWEEN STRESS AND  
675 DRINKING: MODIFYING EFFECTS OF GENDER AND VULNERABILITY. *Alcohol Alcohol.*  
676 2005;40(5):453-460. doi:10.1093/alcalc/agh176
- 677 50. Keyes KM, Hatzenbuehler ML, Hasin DS. Stressful life experiences, alcohol consumption,  
678 and alcohol use disorders: the epidemiologic evidence for four main types of stressors.  
679 *Psychopharmacology (Berl).* 2011;218(1):1-17. doi:10.1007/s00213-011-2236-1
- 680 51. Watt MH, Eaton LA, Choi KW, et al. "It's better for me to drink, at least the stress is going  
681 away": Perspectives on alcohol use during pregnancy among South African women  
682 attending drinking establishments. *Soc Sci Med.* 2014;116:119-125.  
683 doi:10.1016/j.socscimed.2014.06.048

- 684 52. Arch JJ. Pregnancy-specific anxiety: which women are highest and what are the alcohol-  
685 related risks? *Compr Psychiatry*. 2013;54(3):217-228.  
686 doi:10.1016/j.comppsy.2012.07.010
- 687 53. Jack H, Stein A, Newton CR, Hofman KJ. Expanding access to mental health care: a  
688 missing ingredient. *Lancet Glob Health*. 2014;2(4):e183-184. doi:10.1016/S2214-  
689 109X(14)70029-4
- 690 54. Rathod S, Pinninti N, Irfan M, et al. Mental Health Service Provision in Low- and Middle-  
691 Income Countries. *Health Serv Insights*. 2017;10:1178632917694350.  
692 doi:10.1177/1178632917694350
- 693 55. Yotebieng KA, Agot K, Rota G, Cohen CR, Syvertsen JL. A Qualitative Study of Substance  
694 use during Pregnancy: Implications for Reproductive Healthcare in Western Kenya. *Afr J*  
695 *Reprod Health*. 2016;20(4):51-59.
- 696 56. Mulat B, Alemnew W, Shitu K. Alcohol use during pregnancy and associated factors among  
697 pregnant women in Sub-Saharan Africa: further analysis of the recent demographic and  
698 health survey data. *BMC Pregnancy Childbirth*. 2022;22(1):361. doi:10.1186/s12884-022-  
699 04694-z
- 700 57. Minozzi S, Ambrosi L, Saulle R, et al. Psychosocial and medication interventions to stop or  
701 reduce alcohol consumption during pregnancy - Minozzi, S - 2024 | Cochrane Library.  
702 Accessed June 19, 2024.  
703 <https://www.cochranelibrary.com/cdsr/doi/10.1002/14651858.CD015042.pub2/abstract>
- 704 58. N R, L S, Mn E, A M, J H, L S. Preconception interventions to reduce the risk of alcohol-  
705 exposed pregnancies: A systematic review. *Alcohol Clin Exp Res*. 2021;45(12).  
706 doi:10.1111/acer.14725
- 707 59. Staton CA, Vissoci JRN, El-Gabri D, et al. Patient-level interventions to reduce alcohol-  
708 related harms in low- and middle-income countries: A systematic review and meta-  
709 summary. *PLOS Med*. 2022;19(4):e1003961. doi:10.1371/journal.pmed.1003961

710 **Supporting Information**

711 **1. S1 File**

712 **2. S2 File**

713 **3. S3 File**

714 **4. S4 File**

715 **5. S1 Checklist**

716 **6. S2 Checklist**

717 **7. S1 Questionnaire**
