# Supplementary material for: The Burden of Generational Harm due to Alcohol use in Tanzania: a mixed method study of pregnant women
Source: bioRxiv or medRxiv preprint supplement (doi:10.1101/2024.08.22.24312125), 2024-08-28
Supplement: Supplementary file [file media-2.pdf]

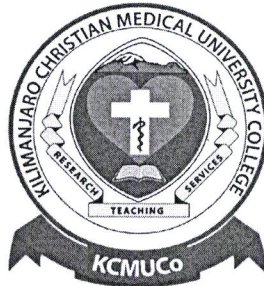

**KILIMANJARO CHRISTIAN MEDICAL UNIVERSITY COLLEGE**  
(A Constituent College of Tumaini University Makumira)

P. O. Box 2240, MOSHI, Tanzania.

**RESEARCH ETHICAL CLEARANCE CERTIFICATE**

No. 2515

Research Proposal No. 1297

**Study Title:** Differences in alcohol use behaviours between men and women in Moshi:  
A mixed method study

**Study Area :** KCMC referral hospital

**PIs Name :** Blandina Mmbaga

**Coinvestigators:** Catherine Staton, Joao Ricardo Nickenig Vissoci, Alena Pauley,  
Ashley Phillips

**Institution (s) :** Kilimanjaro Christian Medical University College

**The Proposal was approved by CRERC on :** 16<sup>th</sup> August, 2021

**Duration of Study :** One year

**From :** 16<sup>th</sup> August, 2021 to 15<sup>th</sup> August, 2022

**PROF. MRAMBA NYINDO**  
Chair – CRERC

**PROF. EPHATA KAAYA**  
PROVOST - KCMU College
